# Supplementary material
Source: HighWire-hosted journal article supplement (https://cmaj.ca/highwire/filestream/149096/field_highwire_adjunct_files/0/230332-res-1-at.pdf)
Supplement: 230332-res-1-at.pdf [file 230332-res-1-at.pdf]

## Online Supplement

### Table of contents

**Online Supplement 1:** RECORD checklist of recommendations for the reporting of studies conducted using routinely collected health data

**Online Supplement 2:** Definitions of food insecurity

**Online Supplement 3:** Outcome definitions

**Online Supplement 4:** Covariate definitions

**Online Supplement 5:** Unadjusted, partially adjusted, and fully adjusted models for the association between household food insecurity and outpatient visits for mental and substance use disorders among children and adolescents

**Online Supplement 6:** Unadjusted and partially adjusted models for the association between household food insecurity and acute care visits for mental and substance use disorders among children and adolescents

**Online Supplement 7:** Unadjusted, partially adjusted, and fully adjusted models for the association between household food insecurity and visits for mental disorders among children and adolescents

**Online Supplement 8:** Unadjusted and partially adjusted models for the association between household food insecurity and visits for substance use disorders among children and adolescents

**Online Supplement 9:** Unadjusted, partially adjusted, and fully adjusted models for the association between household food insecurity and visits for neurodevelopmental disorders among children and adolescents

**Online Supplement 10:** Unadjusted, partially adjusted, and fully adjusted models for the sensitivity analysis of household food insecurity status and any service use for mental and substance use disorders among children and adolescents.

**Online Supplement 11:** Unadjusted, partially adjusted, and fully adjusted models for the association between household food insecurity and any service use for mental and substance use disorders, stratified by age (1-13 years versus 14-17 years).

**Online Supplement 12:** Comparison of the analytic sample to the characteristics of Ontario households from the 2011 census.

**Online Supplement 1. RECORD checklist of recommendations for the reporting of studies conducted using routinely collected health data**

|                                  | Item No | Recommendation                                                                                                                                                                                                                     | Reported                                 |
|----------------------------------|---------|------------------------------------------------------------------------------------------------------------------------------------------------------------------------------------------------------------------------------------|------------------------------------------|
| Title and abstract               | 1       | 1.1 The type of data used should be specified in the title or abstract. When possible, the name of the databases should be included.                                                                                               | Abstract (pg. 2)                         |
|                                  |         | 1.2 If applicable, the geographic region and time frame within which the study took place should be reported in the title or abstract.                                                                                             | Title and Abstract (pg. 2)               |
|                                  |         | 1.3 If linkage between databases was conducted for the study, this should be clearly stated in the title or abstract                                                                                                               | Abstract (pg. 2)                         |
| Introduction                     |         |                                                                                                                                                                                                                                    |                                          |
| Background/rationale             | 2       | Explain the scientific background and rationale for the investigation being reported                                                                                                                                               | Introduction (pg. 3-4)                   |
| Objectives                       | 3       | State specific objectives, including any pre-specified hypotheses                                                                                                                                                                  | Introduction (pg. 4)                     |
| Methods                          |         |                                                                                                                                                                                                                                    |                                          |
| Study design                     | 4       | Present key elements of study design early in the paper                                                                                                                                                                            | Methods (pg. 4-5)                        |
| Setting                          | 5       | Describe the setting, locations, and relevant dates, including periods of recruitment, exposure, follow-up, and data collection                                                                                                    | Methods (pg. 5)                          |
| Participants                     | 6       | 6.1 The methods of study population selection should be listed in detail. If this is not possible, an explanation should be provided.                                                                                              | Methods (pg. 5), Figure 1                |
|                                  |         | 6.2 Any validation studies of the codes or algorithms used to select the population should be referenced. If validation was conducted for this study and not published elsewhere, detailed methods and results should be provided. | Methods (pg. 6-7), Online Supplement 3-4 |
|                                  |         | 6.3 If the study involved linkage of databases, consider use of a flow diagram or other graphical display to demonstrate the linkage process, including the number of individuals with linked data at each stage.                  | Figure 1                                 |
| Variables                        | 7       | A complete list of codes and algorithms used to classify exposures, outcomes, confounders, and effect modifiers should be provided. If these cannot be reported, an explanation should be provided.                                | Online Supplement 2-4                    |
| Data sources/measurement         | 8       | For each variable of interest, give sources of data and details of methods of assessment (measurement). Describe comparability of assessment methods if there is more than one group                                               | Methods (pg. 5-7), Online Supplement 2-4 |
| Bias                             | 9       | Describe any efforts to address potential sources of bias                                                                                                                                                                          | Methods (pg. 7-8)                        |
| Study size                       | 10      | Explain how the study size was arrived at                                                                                                                                                                                          | Figure 1                                 |
| Quantitative variables           | 11      | Explain how quantitative variables were handled in the analyses. If applicable, describe which groupings were chosen and why                                                                                                       | Methods (pg. 7-8)                        |
| Statistical methods              | 12      | 12.1 Describe all statistical methods, including those used to control for confounding                                                                                                                                             | Methods (pg. 7-8)                        |
|                                  |         | 12.2 Describe any methods used to examine subgroups and interactions                                                                                                                                                               | Methods (pg. 8)                          |
|                                  |         | 12.3 Explain how missing data were addressed                                                                                                                                                                                       | Methods (pg. 5)                          |
|                                  |         | 12.4 If applicable, explain how loss to follow-up was addressed                                                                                                                                                                    | Not Applicable                           |
|                                  |         | 12.5 Describe any sensitivity analyses                                                                                                                                                                                             | Methods (pg. 8)                          |
| Data access and cleaning methods | 12      | 12.6 Authors should describe the extent to which the investigators had access to the database population used to create the study population.                                                                                      | Data Availability Statement (pg. 13-14)  |
|                                  |         | 12.7 Authors should provide information on the data cleaning methods used in the study                                                                                                                                             | Figure 1                                 |
| Linkage                          | 12      | 12.8 State whether the study included person-level, institutional-level, or other data linkage across two or more databases. The methods of linkage and methods of linkage quality evaluation should be provided.                  | Methods (pg. 4-5)                        |

|                                                          |    |                                                                                                                                                                                                                                                                                                    |                                                      |
|----------------------------------------------------------|----|----------------------------------------------------------------------------------------------------------------------------------------------------------------------------------------------------------------------------------------------------------------------------------------------------|------------------------------------------------------|
| Results                                                  |    |                                                                                                                                                                                                                                                                                                    |                                                      |
| Participants                                             | 13 | 13.1 Describe in detail the selection of the persons included in the study (i.e. study population selection), including filtering based on data quality, data availability, and linkage. The selection of included persons can be described in the text and/or by means of the study flow diagram. | Figure 1                                             |
| Descriptive data                                         | 14 | 14.1 Give characteristics of study participants (e.g. demographic, clinical, social) and information on exposures and potential confounders                                                                                                                                                        | Results (pg. 8-9), Table 1                           |
|                                                          |    | 14.2 Indicate number of participants with missing data for each variable of interest                                                                                                                                                                                                               | Methods (pg. 5)                                      |
|                                                          |    | 14.3 Summarize follow-up time (e.g. average and total amount)                                                                                                                                                                                                                                      | Not Applicable                                       |
| Outcome data                                             | 15 | Report numbers of outcome events or summary measures over time                                                                                                                                                                                                                                     | Results (pg. 8-9), Table 2                           |
| Main results                                             | 16 | 16.1 Give unadjusted estimates and, if applicable, confounder-adjusted estimates and their precision (e.g. 95% confidence interval). Make clear which confounders were adjusted for and why they were included                                                                                     | Results (pg. 9), Tables 3-4, Online Supplements 5-11 |
|                                                          |    | 16.2 Report category boundaries when continuous variables were categorized                                                                                                                                                                                                                         | Not Applicable                                       |
|                                                          |    | 16.3 If relevant, consider translating estimates of relative risk into absolute risk for a meaningful time period                                                                                                                                                                                  | Not Applicable                                       |
| Other analyses                                           | 17 | Report other analyses done—e.g. analyses of subgroups and interactions, and sensitivity analyses                                                                                                                                                                                                   | Results (pg. 9), Table 4, Online Supplement 10-11    |
| Discussion                                               |    |                                                                                                                                                                                                                                                                                                    |                                                      |
| Key results                                              | 18 | Summarize key results with reference to study objectives                                                                                                                                                                                                                                           | Discussion (pg. 10)                                  |
| Limitations                                              | 19 | Discuss the implications of using data that were not created or collected to answer the specific research question(s). Include discussion of misclassification bias, unmeasured confounding, missing data and changing eligibility over time, as they pertain to the study being reported.         | Discussion (pg. 11-12)                               |
| Interpretation                                           | 20 | Give a cautious overall interpretation of results considering objectives, limitations, multiplicity of analyses, results from similar studies, and other relevant evidence                                                                                                                         | Discussion (pg. 10-11)                               |
| Generalizability                                         | 21 | Discuss the generalizability (external validity) of the study results                                                                                                                                                                                                                              | Discussion (pg. 11-12)                               |
| Other information                                        |    |                                                                                                                                                                                                                                                                                                    |                                                      |
| Funding                                                  | 22 | 22.1 Give the source of funding and the role of the funders for the present study and, if applicable, for the original study on which the present article is based                                                                                                                                 | Funding Statement (pg. 1)                            |
| Accessibility of protocol, raw data and programming code |    | 22.2 Authors should provide information on how to access any supplemental information such as the study protocol, raw data, or programming code.                                                                                                                                                   | Data Availability Statement (pg. 13-14)              |

**Online Supplement 2:** The 18-item household food security survey module (adapted from Health Canada)

| Status   | Interpretation                                                                                                   | Adult scale                      | Child scale                      | Household status                                               |
|----------|------------------------------------------------------------------------------------------------------------------|----------------------------------|----------------------------------|----------------------------------------------------------------|
| Secure   | No report of income-related problems of food access                                                              | No positive response             | No positive response             | Both adult and child status are food secure                    |
| Marginal | Some indication of worry or an income-related barrier to adequate, secure food access                            | No more than 1 positive response | No more than 1 positive response | Either adults or children or both are marginally insecure      |
| Moderate | Compromise in quality and/or quantity of food consumed by adults and/or children due to a lack of money for food | 2-5 positive responses           | 2-5 positive responses           | Either adults or children or both are moderately food insecure |
| Severe   | Disrupted eating patterns and reduced food intake among adults and/or children                                   | 6+ positive responses            | 5+ positive responses            | Either adults or children are severely food insecure           |

**Online Supplement 3: Outcome variable definitions**

| Outcome Variables        | Diagnoses Included                                                                                                                                         | Outpatient Visits (OHIP) | Acute Care Visits (NACRS/DAD/OMHRS)                                                                                                                                                                                                                                                                                                                                              |
|--------------------------|------------------------------------------------------------------------------------------------------------------------------------------------------------|--------------------------|----------------------------------------------------------------------------------------------------------------------------------------------------------------------------------------------------------------------------------------------------------------------------------------------------------------------------------------------------------------------------------|
| <b>Mental Disorders</b>  |                                                                                                                                                            |                          |                                                                                                                                                                                                                                                                                                                                                                                  |
| Psychotic Disorder       | Schizophrenia, Paranoid States, Other Psychoses                                                                                                            | 295, 297, 298            | <p><u>OMHRS:</u><br/>           AXIS1_DSM4CODE_DISCH1 = 295.x, 297.x, 298.x<br/>           PROVDX_DSM4CODE_ADM1 =5</p> <p><u>DAD/NACRS:</u><br/>           DX10CODE1 = F20 (excluding F20.4), F22, F23, F24, F25, F28, F29, F53.1</p>                                                                                                                                            |
| Mood or Anxiety Disorder | Depression, Anxiety Disorders, Bipolar Disorder, Obsessive Compulsive Disorder                                                                             | 296, 300, 311            | <p><u>OMHRS:</u><br/>           AXIS1_DSM4CODE_DISCH1 = 296.x, 300, 300.0x, 300.2x, 300.3x, 300.4x, 301.13, 308.3x, 309.0x, 309.24, 309.28, 309.3x, 309.4x, 309.8x, 309.9x, 311.x<br/>           PROVDX_DSM4CODE_ADM1 =6, 7, 15</p> <p><u>DAD/NACRS:</u><br/>           DX10CODE1 = F30, F31, F32, F33, F34, F38, F39, F40, F41, F42, F43, F48.8, F48.9, F53.0, F93.1, F93.2</p> |
| Other Mental Disorders   | Personality Disorders, Sexual Deviations, Psychosomatic Disturbances, Habit Spasms, Tics, Eating Disorders, Sleep Disorders, Enuresis, Adjustment Reaction | 301, 302, 306, 307, 309  | <p><u>OMHRS:</u><br/>           AXIS1_DSM4CODE_DISCH1 = 300.16, 300.19, 301.x (excluding 301.13), 302.6, 306.x, 307.1x, 307.2x, 307.3x, 307.5x, 309.21, 312.x<br/>           PROVDX_DSM4CODE_ADM1 = 12, 16</p> <p><u>DAD/NACRS:</u><br/>           DX10CODE1 = F50.0, F50.1, F50.2, F50.3, F50.8, F50.9, F60, F61, F62, F68, F69, F21, F94, F95, F98</p>                         |
| Deliberate Self-Harm     | -                                                                                                                                                          | -                        | <p><u>DAD/NACRS:</u><br/>           DX10CODE2-10 = X60-X84, Y10-Y19, Y28 when DX10CODE1 ne F06-F99</p>                                                                                                                                                                                                                                                                           |
| Substance Use            | Alcohol-Induced Psychosis, Substance-Induced Psychosis, Alcoholism, Drug Dependence, Addiction                                                             | 291, 292, 303, 304       | <p><u>OMHRS:</u><br/>           AXIS1_DSM4CODE_DISCH1 = 291.x (excluding 291.82), 292.x (excluding 292.85), 303.x, 304.x, 305.x<br/>           PROVDX_DSM4CODE_ADM1 =4</p> <p><u>DAD/NACRS:</u><br/>           DX10CODE1 = F55, F10 to F19</p>                                                                                                                                   |

**Online Supplement 3 con't.: Outcome variable definitions**

| Outcome Variables                   | Diagnoses Included                                                                                                                                                                                                                                                          | Outpatient Visits (OHIP)                         | Acute Care Visits (NACRS/DAD/OMHRS)                                                                                                                                                                                                                                                                                |
|-------------------------------------|-----------------------------------------------------------------------------------------------------------------------------------------------------------------------------------------------------------------------------------------------------------------------------|--------------------------------------------------|--------------------------------------------------------------------------------------------------------------------------------------------------------------------------------------------------------------------------------------------------------------------------------------------------------------------|
| <b>Neurodevelopmental Disorders</b> | Autism, Behaviour Disorders of Childhood, ADHD, Developmental Delays (e.g. Dyslexia, Dyslalia, Motor Retardation)                                                                                                                                                           | 299, 313, 314, 315                               | <p><u>OMHRS:</u><br/>           AXIS1_DSM4CODE_DISCH1 = 299.x, 313.23, 313.81, 313.89, 313.9x, 314.x, 315.x, 787.6x,<br/>           PROVDX_DSM4CODE_ADM1 = 1</p> <p><u>DAD/NACRS:</u><br/>           DX10CODE1 = F80, F81, F82, F83, F84, F88, F89, F90, F91, F92, F93<br/>           (excluding F93.1, F93.2)</p> |
| <b>Social Problems</b>              | Parent-Child Problems (e.g. Abuse, Neglect), Educational Problems, Social Maladjustment, Other Problems of Social Adjustment, Economic Problems, Marital Difficulties, Problems with Aged Parents/In-Laws, Family Disruption/Divorce, Occupational Problems, Legal Problems | 897, 898, 899, 900, 901, 902, 904, 905, 906, 909 | -                                                                                                                                                                                                                                                                                                                  |

#### Online Supplement 4. Covariate definitions

| Variable                                            | Database | Time captured               | Notes                                                                                                                                                                                                                                                                                                                                                                                                                                                                     |
|-----------------------------------------------------|----------|-----------------------------|---------------------------------------------------------------------------------------------------------------------------------------------------------------------------------------------------------------------------------------------------------------------------------------------------------------------------------------------------------------------------------------------------------------------------------------------------------------------------|
| Survey cycle                                        | CCHS     | HFSSM cycle                 |                                                                                                                                                                                                                                                                                                                                                                                                                                                                           |
| Age of child at time of survey interview            | RPDB     | HFSSM interview date        |                                                                                                                                                                                                                                                                                                                                                                                                                                                                           |
| Sex of child                                        | RPDB     | HFSSM interview date        |                                                                                                                                                                                                                                                                                                                                                                                                                                                                           |
| Rurality                                            | RPDB     | HFSSM interview date        | Rural areas have less than 1,000 people and a population density of fewer than 400 persons per square kilometre                                                                                                                                                                                                                                                                                                                                                           |
| Ethnic Origin/Racial Group                          | CCHS     | HFSSM interview date        | Individuals can select from 12 categories, and may identify with more than one group.<br><br>To prevent small cells, we collapsed some categories as follows:<br><ul style="list-style-type: none"> <li>- White</li> <li>- Black</li> <li>- East/Southeast Asian (includes Chinese, Filipino, Southeast Asian, Korean, Japanese)</li> <li>- West Asian/Arabic (includes Arab and West Asian)</li> <li>- South Asian</li> <li>- Latin American</li> <li>- Other</li> </ul> |
| Mother's immigrant Status                           | IRCC     | Before HFSSM interview date | Those with missing landing date would be categorized as long-term resident                                                                                                                                                                                                                                                                                                                                                                                                |
| Distribution of household income – provincial level | CCHS     | On HFSSM interview date     | Adjusted ratio of total household income to the low income cut-off corresponding to their household and community size                                                                                                                                                                                                                                                                                                                                                    |
| Single parent home                                  | CCHS     | On HFSSM interview date     |                                                                                                                                                                                                                                                                                                                                                                                                                                                                           |
| Number of children living in household              | CCHS     | On HFSSM interview date     |                                                                                                                                                                                                                                                                                                                                                                                                                                                                           |

Abbreviations: Canadian Community Health Survey (CCHS); Household Food Security Survey Module (HFSSM)

**Online Supplement 5:** Unadjusted, partially adjusted, and fully adjusted models for the association between household food insecurity and outpatient visits for mental and substance use disorders among children and adolescents.

|                                                      |                                | <b>Unadjusted<br/>PR (95%CI)</b> | <b>Partially Adjusted<br/>PR (95%CI)</b> | <b>Fully Adjusted<br/>PR (95%CI)</b> |
|------------------------------------------------------|--------------------------------|----------------------------------|------------------------------------------|--------------------------------------|
| <b>Marginal, Moderate, or Severe Food Insecurity</b> |                                | 1.60 (1.47, 1.74)                | 1.55 (1.41, 1.70)                        | 1.39 (1.26, 1.53)                    |
| <b>Age at Interview (Years)</b>                      |                                | -                                | 1.05 (1.04, 1.06)                        | 1.06 (1.05, 1.07)                    |
| <b>Female Sex</b>                                    |                                | -                                | 0.72 (0.67, 0.78)                        | 0.72 (0.67, 0.77)                    |
| <b>Low Household Income</b>                          |                                | -                                | 1.16 (1.05, 1.27)                        | 1.06 (0.96, 1.18)                    |
| <b>Rural Residence</b>                               |                                | -                                | 0.81 (0.73, 0.89)                        | 0.82 (0.74, 0.90)                    |
| <b>Racial Group</b>                                  | White                          |                                  |                                          | <i>Ref.</i>                          |
|                                                      | Black                          |                                  |                                          | 0.77 (0.61, 0.98)                    |
|                                                      | East/Southeast Asian           |                                  |                                          | 0.98 (0.79, 1.22)                    |
|                                                      | West Asian/Arabic              | -                                | -                                        | 0.62 (0.41, 0.96)                    |
|                                                      | South Asian                    |                                  |                                          | 0.79 (0.61, 1.01)                    |
|                                                      | Latin American                 |                                  |                                          | 0.90 (0.61, 1.33)                    |
|                                                      | Other                          |                                  |                                          | 0.95 (0.84, 1.08)                    |
| <b>Maternal Migrant Status</b>                       | Recent (<10 Years)             |                                  |                                          | 1.15 (0.85, 1.57)                    |
|                                                      | Settled (10-19 Years)          | -                                | -                                        | 0.91 (0.75, 1.10)                    |
|                                                      | Long-Term Resident/Non-Migrant |                                  |                                          | <i>Ref.</i>                          |
| <b>Past Year Maternal Mental Health Visit</b>        |                                | -                                | -                                        | 1.98 (1.83, 2.14)                    |
| <b>Past Year Maternal Substance Use Visit</b>        |                                | -                                | -                                        | 0.73 (0.53, 1.01)                    |
| <b>Single Parent Household</b>                       | Yes                            |                                  |                                          | 1.34 (1.22, 1.48)                    |
|                                                      | No                             | -                                | -                                        | <i>Ref.</i>                          |
|                                                      | Unknown                        |                                  |                                          | 1.09 (0.96, 1.25)                    |
| <b>Number of Children in Household</b>               | 1                              |                                  |                                          | <i>Ref.</i>                          |
|                                                      | 2                              |                                  |                                          | 0.88 (0.81, 0.96)                    |
|                                                      | 3                              | -                                | -                                        | 0.81 (0.72, 0.90)                    |
|                                                      | 4+                             |                                  |                                          | 0.86 (0.73, 1.02)                    |
| <b>Survey Cycle</b>                                  | 2005                           |                                  |                                          | 0.74 (0.65, 0.85)                    |
|                                                      | 2007/2008                      |                                  |                                          | 0.81 (0.72, 0.92)                    |
|                                                      | 2009/2010                      | -                                | -                                        | 0.83 (0.73, 0.93)                    |
|                                                      | 2011/2012                      |                                  |                                          | 0.92 (0.82, 1.03)                    |
|                                                      | 2013/2014                      |                                  |                                          | <i>Ref.</i>                          |
| <b>Survey Respondent</b>                             | Child                          |                                  |                                          | <i>Ref.</i>                          |
|                                                      | Mother                         | -                                | -                                        | 1.18 (1.07, 1.31)                    |
|                                                      | Sibling                        |                                  |                                          | 0.98 (0.88, 1.09)                    |

**Online Supplement 6:** Unadjusted and partially adjusted models for the association between household food insecurity and acute care visits for mental and substance use disorders among children and adolescents.

|                                                      | <b>Unadjusted<br/>PR (95%CI)</b> | <b>Partially Adjusted<br/>PR (95%CI)</b> |
|------------------------------------------------------|----------------------------------|------------------------------------------|
| <b>Marginal, Moderate, or Severe Food Insecurity</b> | 1.71 (1.23, 2.37)                | 1.74 (1.24, 2.45)                        |
| <b>Age at Interview (Years)</b>                      | -                                | 1.40 (1.32, 1.48)                        |
| <b>Female Sex</b>                                    | -                                | 1.64 (1.23, 2.18)                        |
| <b>Low Household Income</b>                          | -                                | 1.29 (0.90, 1.85)                        |
| <b>Rural Residence</b>                               | -                                | 1.06 (0.75, 1.50)                        |

**Online Supplement 7:** Unadjusted, partially adjusted, and fully adjusted models for the association between household food insecurity and visits for mental disorders among children and adolescents.

|                                                      | <b>Unadjusted<br/>PR (95%CI)</b> | <b>Partially Adjusted<br/>PR (95%CI)</b> | <b>Fully Adjusted<br/>PR (95%CI)</b> |
|------------------------------------------------------|----------------------------------|------------------------------------------|--------------------------------------|
| <b>Marginal, Moderate, or Severe Food Insecurity</b> | 1.39 (1.23, 1.58)                | 1.43 (1.25, 1.64)                        | 1.27 (1.11, 1.46)                    |
| <b>Age at Interview (Years)</b>                      | -                                | 1.13 (1.12, 1.15)                        | 1.13 (1.11, 1.15)                    |
| <b>Female Sex</b>                                    | -                                | 1.22 (1.10, 1.35)                        | 1.21 (1.09, 1.34)                    |
| <b>Low Household Income</b>                          | -                                | 1.05 (0.91, 1.21)                        | 0.96 (0.82, 1.11)                    |
| <b>Rural Residence</b>                               | -                                | 0.75 (0.65, 0.86)                        | 0.77 (0.67, 0.89)                    |
| <b>Racial Group</b>                                  |                                  |                                          | <i>Ref.</i>                          |
| White                                                |                                  |                                          | 0.86 (0.62, 1.21)                    |
| Black                                                |                                  |                                          | 0.90 (0.66, 1.23)                    |
| East/Southeast Asian                                 |                                  |                                          | 0.79 (0.46, 1.37)                    |
| West Asian/Arabic                                    | -                                | -                                        | 0.96 (0.69, 1.35)                    |
| South Asian                                          |                                  |                                          | 1.03 (0.61, 1.76)                    |
| Latin American                                       |                                  |                                          | 0.92 (0.78, 1.09)                    |
| Other                                                |                                  |                                          |                                      |
| <b>Maternal Migrant Status</b>                       |                                  |                                          | 1.42 (0.87, 2.30)                    |
| Recent (<10 Years)                                   |                                  |                                          | 0.97 (0.75, 1.25)                    |
| Settled (10-19 Years)                                | -                                | -                                        | <i>Ref.</i>                          |
| Long-Term Resident/Non-Migrant                       |                                  |                                          |                                      |
| <b>Past Year Maternal Mental Health Visit</b>        | -                                | -                                        | 2.19 (1.97, 2.44)                    |
| <b>Past Year Maternal Substance Use Visit</b>        | -                                | -                                        | 0.85 (0.55, 1.33)                    |
| <b>Single Parent Household</b>                       |                                  |                                          | 1.29 (1.13, 1.48)                    |
| Yes                                                  |                                  |                                          | <i>Ref.</i>                          |
| No                                                   | -                                | -                                        | 1.08 (0.90, 1.31)                    |
| Unknown                                              |                                  |                                          |                                      |
| <b>Number of Children in Household</b>               |                                  |                                          | <i>Ref.</i>                          |
| 1                                                    |                                  |                                          | 0.84 (0.74, 0.95)                    |
| 2                                                    | -                                | -                                        | 0.75 (0.64, 0.88)                    |
| 3                                                    |                                  |                                          | 0.83 (0.66, 1.05)                    |
| 4+                                                   |                                  |                                          |                                      |
| <b>Survey Cycle</b>                                  |                                  |                                          | 0.75 (0.62, 0.91)                    |
| 2005                                                 |                                  |                                          | 0.78 (0.65, 0.93)                    |
| 2007/2008                                            |                                  |                                          | 0.78 (0.66, 0.93)                    |
| 2009/2010                                            | -                                | -                                        | 0.89 (0.75, 1.05)                    |
| 2011/2012                                            |                                  |                                          | <i>Ref.</i>                          |
| 2013/2014                                            |                                  |                                          |                                      |
| <b>Survey Respondent</b>                             |                                  |                                          | <i>Ref.</i>                          |
| Child                                                |                                  |                                          | 1.06 (0.92, 1.21)                    |
| Mother                                               | -                                | -                                        | 0.94 (0.81, 1.09)                    |
| Sibling                                              |                                  |                                          |                                      |

**Online Supplement 8:** Unadjusted and partially adjusted models for the association between household food insecurity and visits for substance use disorders among children and adolescents.

|                                                      | <b>Unadjusted<br/>PR (95%CI)</b> | <b>Partially Adjusted<br/>PR (95%CI)</b> |
|------------------------------------------------------|----------------------------------|------------------------------------------|
| <b>Marginal, Moderate, or Severe Food Insecurity</b> | 1.90 (1.05, 3.43)                | 2.26 (1.18, 4.33)                        |
| <b>Age at Interview (Years)</b>                      | -                                | 1.29 (1.17, 1.43)                        |
| <b>Female Sex</b>                                    | -                                | 1.11 (0.66, 1.87)                        |
| <b>Low Household Income</b>                          | -                                | 0.77 (0.35, 1.70)                        |
| <b>Rural Residence</b>                               | -                                | 0.83 (0.42, 1.65)                        |

**Online Supplement 9:** Unadjusted, partially adjusted, and fully adjusted models for the association between household food insecurity and visits for neurodevelopmental disorders among children and adolescents.

|                                                      |                                | <b>Unadjusted<br/>PR (95%CI)</b> | <b>Partially Adjusted<br/>PR (95%CI)</b> | <b>Fully Adjusted<br/>PR (95%CI)</b> |
|------------------------------------------------------|--------------------------------|----------------------------------|------------------------------------------|--------------------------------------|
| <b>Marginal, Moderate, or Severe Food Insecurity</b> |                                | 1.87 (1.66, 2.10)                | 1.71 (1.50, 1.95)                        | 1.55 (1.36, 1.77)                    |
| <b>Age at Interview (Years)</b>                      |                                | -                                | 1.00 (0.99, 1.01)                        | 1.02 (1.00, 1.03)                    |
| <b>Female Sex</b>                                    |                                | -                                | 0.44 (0.40, 0.49)                        | 0.44 (0.40, 0.49)                    |
| <b>Low Household Income</b>                          |                                | -                                | 1.29 (1.13, 1.47)                        | 1.21 (1.05, 1.39)                    |
| <b>Rural Residence</b>                               |                                | -                                | 0.85 (0.74, 0.98)                        | 0.85 (0.74, 0.98)                    |
| <b>Racial Group</b>                                  | White                          |                                  |                                          | <i>Ref.</i>                          |
|                                                      | Black                          |                                  |                                          | 0.67 (0.46, 0.96)                    |
|                                                      | East/Southeast Asian           |                                  |                                          | 1.02 (0.75, 1.38)                    |
|                                                      | West Asian/Arabic              | -                                | -                                        | 0.46 (0.23, 0.91)                    |
|                                                      | South Asian                    |                                  |                                          | 0.71 (0.49, 1.03)                    |
|                                                      | Latin American                 |                                  |                                          | 0.94 (0.55, 1.62)                    |
|                                                      | Other                          |                                  |                                          | 1.08 (0.92, 1.28)                    |
| <b>Maternal Migrant Status</b>                       | Recent (<10 Years)             |                                  |                                          | 1.05 (0.71, 1.55)                    |
|                                                      | Settled (10-19 Years)          | -                                | -                                        | 0.77 (0.58, 1.02)                    |
|                                                      | Long-Term Resident/Non-Migrant |                                  |                                          | <i>Ref.</i>                          |
| <b>Past Year Maternal Mental Health Visit</b>        |                                | -                                | -                                        | 1.89 (1.69, 2.11)                    |
| <b>Past Year Maternal Substance Use Visit</b>        |                                | -                                | -                                        | 0.47 (0.27, 0.82)                    |
| <b>Single Parent Household</b>                       | Yes                            |                                  |                                          | 1.34 (1.17, 1.54)                    |
|                                                      | No                             | -                                | -                                        | <i>Ref.</i>                          |
|                                                      | Unknown                        |                                  |                                          | 1.09 (0.90, 1.33)                    |
| <b>Number of Children in Household</b>               | 1                              |                                  |                                          | <i>Ref.</i>                          |
|                                                      | 2                              |                                  |                                          | 0.92 (0.81, 1.04)                    |
|                                                      | 3                              | -                                | -                                        | 0.83 (0.71, 0.97)                    |
|                                                      | 4+                             |                                  |                                          | 0.82 (0.65, 1.03)                    |
| <b>Survey Cycle</b>                                  | 2005                           |                                  |                                          | 0.68 (0.56, 0.83)                    |
|                                                      | 2007/2008                      |                                  |                                          | 0.83 (0.69, 0.98)                    |
|                                                      | 2009/2010                      | -                                | -                                        | 0.83 (0.70, 0.98)                    |
|                                                      | 2011/2012                      |                                  |                                          | 0.89 (0.75, 1.05)                    |
|                                                      | 2013/2014                      |                                  |                                          | <i>Ref.</i>                          |
| <b>Survey Respondent</b>                             | Child                          |                                  |                                          | <i>Ref.</i>                          |
|                                                      | Mother                         | -                                | -                                        | 1.31 (1.12, 1.54)                    |
|                                                      | Sibling                        |                                  |                                          | 1.02 (0.86, 1.21)                    |

**Online Supplement 10:** Unadjusted, partially adjusted, and fully adjusted models for the sensitivity analysis of household food insecurity status and any service use for mental and substance use disorders among children and adolescents.

|                                               |                                | <b>Unadjusted<br/>PR (95%CI)</b> | <b>Partially Adjusted<br/>PR (95%CI)</b> | <b>Fully Adjusted<br/>PR (95%CI)</b> |
|-----------------------------------------------|--------------------------------|----------------------------------|------------------------------------------|--------------------------------------|
| <b>Level of Food Insecurity</b>               | Food Secure                    | <i>Ref.</i>                      | <i>Ref.</i>                              | <i>Ref.</i>                          |
|                                               | Marginal Food Insecurity       | 1.47 (1.28, 1.68)                | 1.46 (1.27, 1.68)                        | 1.37 (1.19, 1.58)                    |
|                                               | Moderate Food Insecurity       | 1.63 (1.45, 1.84)                | 1.56 (1.38, 1.77)                        | 1.39 (1.23, 1.58)                    |
|                                               | Severe Food Insecurity         | 1.78 (1.51, 2.09)                | 1.73 (1.45, 2.05)                        | 1.42 (1.19, 1.69)                    |
| <b>Age at Interview (Years)</b>               | -                              | 1.05 (1.04, 1.06)                | 1.06 (1.05, 1.07)                        |                                      |
| <b>Female Sex</b>                             | -                              | 0.72 (0.67, 0.78)                | 0.72 (0.67, 0.77)                        |                                      |
| <b>Low Household Income</b>                   | -                              | 1.14 (1.04, 1.26)                | 1.06 (0.96, 1.18)                        |                                      |
| <b>Rural Residence</b>                        | -                              | 0.80 (0.73, 0.89)                | 0.82 (0.74, 0.90)                        |                                      |
| <b>Racial Group</b>                           | White                          |                                  |                                          | <i>Ref.</i>                          |
|                                               | Black                          |                                  |                                          | 0.77 (0.61, 0.98)                    |
|                                               | East/Southeast Asian           |                                  |                                          | 0.98 (0.79, 1.22)                    |
|                                               | West Asian/Arabic              | -                                | -                                        | 0.62 (0.41, 0.96)                    |
|                                               | South Asian                    |                                  |                                          | 0.79 (0.61, 1.01)                    |
|                                               | Latin American                 |                                  |                                          | 0.90 (0.61, 1.33)                    |
|                                               | Other                          |                                  |                                          | 0.95 (0.84, 1.08)                    |
| <b>Maternal Migrant Status</b>                | Recent (<10 Years)             |                                  |                                          | 1.15 (0.85, 1.57)                    |
|                                               | Settled (10-19 Years)          | -                                | -                                        | 0.91 (0.75, 1.10)                    |
|                                               | Long-Term Resident/Non-Migrant |                                  |                                          | <i>Ref.</i>                          |
| <b>Past Year Maternal Mental Health Visit</b> | -                              | -                                | 1.98 (1.83, 2.14)                        |                                      |
| <b>Past Year Maternal Substance Use Visit</b> | -                              | -                                | 0.73 (0.52, 1.01)                        |                                      |
| <b>Single Parent Household</b>                | Yes                            |                                  |                                          | 1.34 (1.22, 1.48)                    |
|                                               | No                             | -                                | -                                        | <i>Ref.</i>                          |
|                                               | Unknown                        |                                  |                                          | 1.09 (0.96, 1.25)                    |
| <b>Number of Children in Household</b>        | 1                              |                                  |                                          | <i>Ref.</i>                          |
|                                               | 2                              |                                  |                                          | 0.88 (0.81, 0.96)                    |
|                                               | 3                              | -                                | -                                        | 0.81(0.72, 0.90)                     |
|                                               | 4+                             |                                  |                                          | 0.86 (0.73, 1.02)                    |
| <b>Survey Cycle</b>                           | 2005                           |                                  |                                          | 0.74 (0.65, 0.85)                    |
|                                               | 2007/2008                      |                                  |                                          | 0.81 (0.72, 0.92)                    |
|                                               | 2009/2010                      | -                                | -                                        | 0.83 (0.73, 0.93)                    |
|                                               | 2011/2012                      |                                  |                                          | 0.92 (0.82, 1.03)                    |
|                                               | 2013/2014                      |                                  |                                          | <i>Ref.</i>                          |
| <b>Survey Respondent</b>                      | Child                          |                                  |                                          | <i>Ref.</i>                          |
|                                               | Mother                         | -                                | -                                        | 1.18 (1.07, 1.31)                    |
|                                               | Sibling                        |                                  |                                          | 0.98 (0.88, 1.09)                    |

**Online Supplement 11:** Unadjusted, partially adjusted, and fully adjusted models for the association between household food insecurity and any service use for mental and substance use disorders, stratified by age (1-13 years versus 14-17 years).

|                                                      | Pre-School and Elementary School (age 1-13 years) |                               |                           | High School (age 14-17 years) |                               |                           |
|------------------------------------------------------|---------------------------------------------------|-------------------------------|---------------------------|-------------------------------|-------------------------------|---------------------------|
|                                                      | Unadjusted PR (95%CI)                             | Partially Adjusted PR (95%CI) | Fully Adjusted PR (95%CI) | Unadjusted PR (95%CI)         | Partially Adjusted PR (95%CI) | Fully Adjusted PR (95%CI) |
| <b>Marginal, Moderate, or Severe Food Insecurity</b> | 1.54 (1.39, 1.71)                                 | 1.48 (1.32, 1.66)             | 1.33 (1.19, 1.50)         | 1.78 (1.54, 2.05)             | 1.69 (1.45, 1.97)             | N/A                       |
| <b>Age at Interview (Years)</b>                      | -                                                 | 1.07 (1.06, 1.08)             | 1.09 (1.07, 1.10)         | -                             | 1.05 (1.00, 1.11)             |                           |
| <b>Female Sex</b>                                    | -                                                 | 0.57 (0.52, 0.62)             | 0.57 (0.52, 0.62)         | -                             | 1.17 (1.03, 1.31)             |                           |
| <b>Low Household Income</b>                          | -                                                 | 1.14 (1.01, 1.28)             | 1.03 (0.92, 1.17)         | -                             | 1.20 (1.01, 1.42)             |                           |
| <b>Rural Residence</b>                               | -                                                 | 0.85 (0.76, 0.96)             | 0.88 (0.78, 0.99)         | -                             | 0.71 (0.60, 0.85)             |                           |
| <b>Racial Group</b>                                  |                                                   |                               | <i>Ref.</i>               |                               |                               |                           |
| White                                                |                                                   |                               | <i>Ref.</i>               |                               |                               |                           |
| Black                                                |                                                   |                               | 0.76 (0.56, 1.02)         |                               |                               |                           |
| East/Southeast Asian                                 |                                                   |                               | 1.04 (0.81, 1.33)         |                               |                               |                           |
| West Asian/Arabic                                    | -                                                 | -                             | 0.68 (0.42, 1.12)         | -                             | -                             |                           |
| South Asian                                          |                                                   |                               | 0.81 (0.61, 1.09)         |                               |                               |                           |
| Latin American                                       |                                                   |                               | 0.88 (0.56, 1.38)         |                               |                               |                           |
| Other                                                |                                                   |                               | 0.98 (0.85, 1.14)         |                               |                               |                           |
| <b>Maternal Migrant Status</b>                       |                                                   |                               |                           |                               |                               |                           |
| Recent (<10 Years)                                   |                                                   |                               | 1.23 (0.90, 1.70)         |                               |                               |                           |
| Settled (10-19 Years)                                | -                                                 | -                             | 1.01 (0.82, 1.24)         | -                             | -                             |                           |
| Long-Term Resident/Non-Migrant                       |                                                   |                               | <i>Ref.</i>               |                               |                               |                           |
| <b>Past Year Maternal Mental Health Visit</b>        | -                                                 | -                             | 1.84 (1.67, 2.02)         | -                             | -                             |                           |
| <b>Past Year Maternal Substance Use Visit</b>        | -                                                 | -                             | 0.59 (0.37, 0.92)         | -                             | -                             |                           |
| <b>Single Parent Household</b>                       |                                                   |                               |                           |                               |                               |                           |
| Yes                                                  |                                                   |                               | 1.38 (1.23, 1.56)         |                               |                               |                           |
| No                                                   | -                                                 | -                             | <i>Ref.</i>               | -                             | -                             |                           |
| Unknown                                              |                                                   |                               | 1.05 (0.89, 1.24)         |                               |                               |                           |
| <b>Number of Children in Household</b>               |                                                   |                               |                           |                               |                               |                           |
| 1                                                    |                                                   |                               | <i>Ref.</i>               |                               |                               |                           |
| 2                                                    |                                                   |                               | 0.82 (0.73, 0.92)         |                               |                               |                           |
| 3                                                    | -                                                 | -                             | 0.74 (0.65, 0.85)         | -                             | -                             |                           |
| 4+                                                   |                                                   |                               | 0.80 (0.66, 0.97)         |                               |                               |                           |
| <b>Survey Cycle</b>                                  |                                                   |                               |                           |                               |                               |                           |
| 2005                                                 |                                                   |                               | 0.80 (0.68, 0.95)         |                               |                               |                           |
| 2007/2008                                            |                                                   |                               | 0.90 (0.77, 1.05)         |                               |                               |                           |
| 2009/2010                                            | -                                                 | -                             | 0.89 (0.76, 1.03)         | -                             | -                             |                           |
| 2011/2012                                            |                                                   |                               | 0.98 (0.84, 1.14)         |                               |                               |                           |
| 2013/2014                                            |                                                   |                               | <i>Ref.</i>               |                               |                               |                           |
| <b>Survey Respondent</b>                             |                                                   |                               |                           |                               |                               |                           |
| Child                                                |                                                   |                               | <i>Ref.</i>               |                               |                               |                           |
| Mother                                               | -                                                 | -                             | 1.36 (1.18, 1.56)         | -                             | -                             |                           |
| Sibling                                              |                                                   |                               | 1.10 (0.95, 1.28)         |                               |                               |                           |



**Online Supplement 12:** Comparison of the analytic sample to the characteristics of Ontario households from the 2011 census.

|                                        |                      | <b>Analytic Sample</b> | <b>Census 2011</b> |
|----------------------------------------|----------------------|------------------------|--------------------|
| <b>Age Group</b>                       | 1-3 Years            | 15.4%                  | 16.6%              |
|                                        | 4-5 Years            | 10.2%                  | 11.1%              |
|                                        | 6-13 Years           | 47.8%                  | 46.3%              |
|                                        | 14-17 Years          | 26.6%                  | 26.1%              |
| <b>Female</b>                          |                      | 48.9%                  | 48.7%              |
| <b>Rural Residence</b>                 |                      | 20.7%                  | 14.1%              |
| <b>Racial Group*</b>                   | White                | 76.4%                  | 71.0%              |
|                                        | Black                | 2.8%                   | 5.0%               |
|                                        | East/Southeast Asian | 3.6%                   | 10.0%              |
|                                        | West Asian/Arabic    | 1.1%                   | 2.8%               |
|                                        | South Asian          | 3.2%                   | 8.7%               |
|                                        | Latin American       | 0.8%                   | 1.5%               |
|                                        | Other                | 13.5%                  | 1.7%               |
| <b>Maternal Migrant Status</b>         | Recent (<10 Years)   | 2.3%                   | 7.1%               |
| <b>Single Parent Household</b>         |                      | 15.7%                  | 16.7%              |
| <b>Low Household Income*</b>           |                      | 17.8%                  | 19.8%              |
| <b>Number of Children in Household</b> | 1                    | 21.3%                  | 43.6%              |
|                                        | 2                    | 48.8%                  | 39.8%              |
|                                        | 3+                   | 29.9%                  | 16.6%              |

*\*Obtained from the 2016 census due to lack of information on 2011 census*
